# Supplementary material for: Humoral and T-Cell Mediated Response after the Third Dose of mRNA Vaccines in Patients with Systemic Lupus Erythematosus on Belimumab
Source: MDPI journal article supplement (doi:10.3390/jcm12031083), 2023-01-30
Supplement: s1 [file s1]

**Table S1.** Demographic characteristics and immune response of the control group.

|                                                                    | Control 1 | Control 2 | Control 3 | Control 4 | Control 5 | Control 6 | Control 7 | Control 8 | Control 9 | Control 10 | Control 11 | Control 12 | Control 13 |
|--------------------------------------------------------------------|-----------|-----------|-----------|-----------|-----------|-----------|-----------|-----------|-----------|------------|------------|------------|------------|
| <b>Sex</b>                                                         | Female    | Female    | Female    | Male      | Male      | Male      | Female    | Female    | Female    | Female     | Male       | Male       | Female     |
| <b>Age</b>                                                         | 44        | 33        | 60        | 50        | 41        | 46        | 47        | 43        | 46        | 42         | 50         | 67         | 37         |
| <b>Humoral and cellular response after the II dose (T0 – 2D4W)</b> |           |           |           |           |           |           |           |           |           |            |            |            |            |
| Anti-RBD antibody titre, U/ml                                      | 2500      | 1133      | 1624      | 566       | 908       | 907       | 2500      | 1947      | 271       | 271        | 271        | 271        | 271        |
| Cellular response (quantitative), pg/ml                            | 204.8     | 21.85     | 472.46    | 126.09    | 25.87     | 419.03    | 1036.22   | 331       | 143.19    | 67.42      | 1558.51    | 147.71     | 709        |
| Cellular response (qualitative)                                    | Present    | Present    | Present    | Present    |
